# Supplementary material
Source: PubMed Central journal article supplement (PMC6644164)
Supplement: supplementary_data_ddz078.pdf [file supplementary_data_ddz078.pdf]

## Supplementary Data

**Figure S1. RT-PCR analysis of *nrap*.** Control 1-cell zebrafish embryos were injected with different amounts of *nrap* morpholinos targeting exon2-intron2 (ex2-in2) or exon3-intron3 (ex3-in3). RT-PCR analysis was performed on 3 dpf larval fish.

**Figure S2. Transient *NRAP* overexpression results in reduced motor function in zebrafish.** (A) Overexpression of *NRAP* mRNA in zebrafish. No phenotypic changes were observed in fish injected with 100ng of *NRAP* mRNA in comparison to the control. Larval fish injected with a higher dose of *NRAP* mRNA exhibited dorsal curvature and significantly reduced mobility in comparison to uninjected controls. Phenotypic analysis and quantification of motor function was performed in 34-69 zebrafish in each group. Each experiment was performed in triplicates using independent zebrafish clutches. Kruskal Wallis one-way analysis on variance on ranks was performed and pairwise multiple comparison procedures were done according to Dunn's method. Data are presented as mean  $\pm$  s.d. \* $p < 0.01$ ; *n.s.*: non-significant.

**Figure S3. *NRAP* is localized with actin in embryonic skeletal muscle in zebrafish.** (A) Whole mount immunofluorescence of 2 dpf *mylz:NRAP-gfp* embryos with phalloidin and *gfp* antibodies. (B) Co-localization analysis of actin and GFP staining was performed with imageJ.

**Table S1. KLHL41 interactions identified by yeast -two hybrid screening.**
